# Supplementary material for: p-Chloranil modified carbon nanotubes paste electrode as a voltammetric sensor for the simultaneous determination of methyldopa and uric acid
Source: Royal Society of Chemistry journal article supplement (doi:10.1039/c2ay05865k), 2012-01-01
Supplement: c2ay05865k.pdf [file c2ay05865k.pdf]

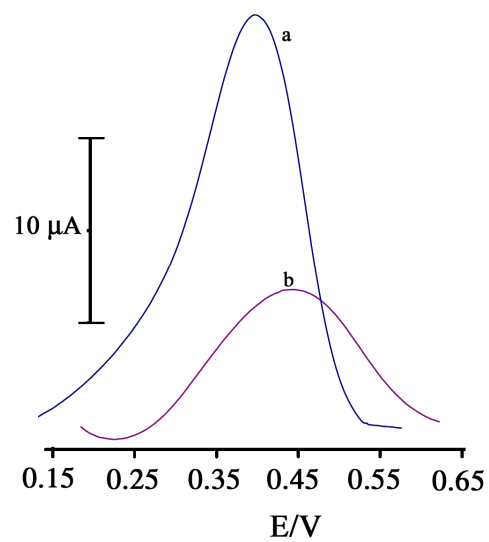

Above figure shows square wave voltammograms of MDOP (a) and UA (b) at a surface of unmodified CNTPE. As can be seen, at unmodified CNTPE, the peaks potential of MDOP and UA overlapped with each other.
